# Supplementary material
Source: Springer Nature journal article supplement (https://www.springermedizin.de/resource/supplementary/12933_2004_25_MOESM6_ESM.pdf/9539438)
Supplement: MOESM6 [file 9539438]

# THE "SPIRIT" OF VASCULARIZATION

**WITHIN  
PLAQUE  
BAD!  
IPH**

News in Physiological Sci.  
June 1999; 14: 121-125  
Buschmann I, Schaper W

**GOOD!**

**Angiogenesis**

**OUTSIDE**

**PLAQUE**

**GOOD!**

**(HIBERNATING  
MYOCARDIUM)**

Substrate: Preexisting capillaries  
Promoters: Hif-1 TACGTGCT  
Inducers: Ischemia  
Result: Increased Capillary density

**I N F L A M M A T I O N**  
Time: Days.

Intraplaque  
Macrophages  
Ox-LDL induced  
VEGF.

**FGF-1 FGF-2  
VEGF PDGF  
MCP-1 , GM-CSF**

Substrate: Preexisting Arterioles  
Promoters: Shear stress responsive element GAGACC  
Inducers: Shear stress INFLAM  
Result: New Arteries.

**I N F L A M M A T I O N**  
Time: Days to WEEKS/ Mo.

Circulating Cells  
Monocytes  
Remodeling

**Arteriogenesis**
